# Supplementary material for: Integrating molybdenum into zinc vanadate enables Zn3V2MoO8 as a high-capacity Zn-supplied cathode for Zn-metal free aqueous batteries
Source: Royal Society of Chemistry journal article supplement (doi:10.1039/d3nr00136a), 2023-01-01
Supplement: d3nr00136a1.pdf [file d3nr00136a1.pdf]

## Supplementary Information

### Integrating molybdenum into zinc vanadate enable $\text{Zn}_3\text{V}_2\text{MoO}_8$ as a high-capacity Zn-supplied cathode for Zn-metal free aqueous batteries

Gang Wang,<sup>a</sup> Quan Kuang,<sup>\*,a</sup> Pan Jiang,<sup>a</sup> Qinghua Fan,<sup>a</sup> Youzhong Dong,<sup>a</sup> Yanming Zhao<sup>a,b</sup>

<sup>a</sup> School of Physics and Optoelectronics, South China University of Technology, Guangzhou, 510641, P. R. China

<sup>b</sup> South China Institute of Collaborative Innovation, Dongguan, 523808, P. R. China

\*Corresponding author. E-mail: sckq@scut.edu.cn

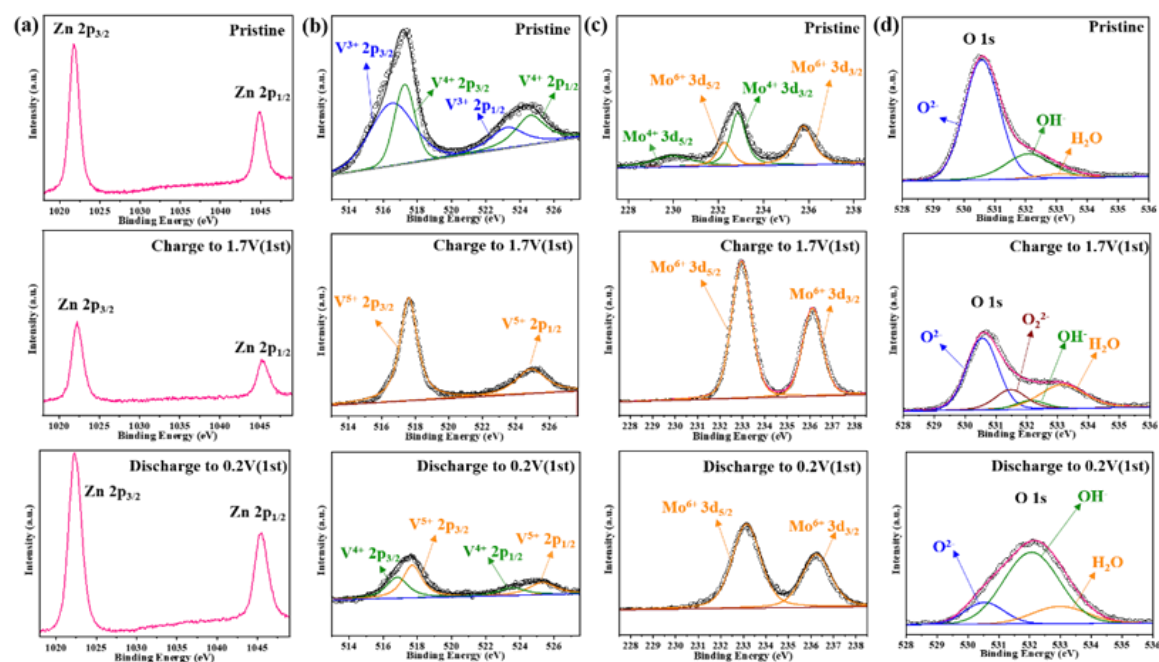

**Figure S1.** XPS spectra of (a) Zn 2p, (b) V 2p, (c) Mo 3d, and (d) O 1s regions of  $\text{Zn}_3\text{V}_2\text{MoO}_8$  cathodes at pristine, full-charge and full-discharge states.

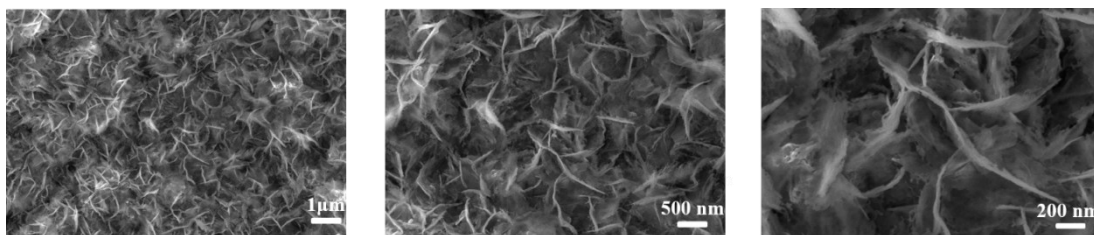

**Figure S2.** SEM images of Zn<sub>3</sub>V<sub>2</sub>MoO<sub>8</sub> cathode at the 2nd full discharge at different magnifications.

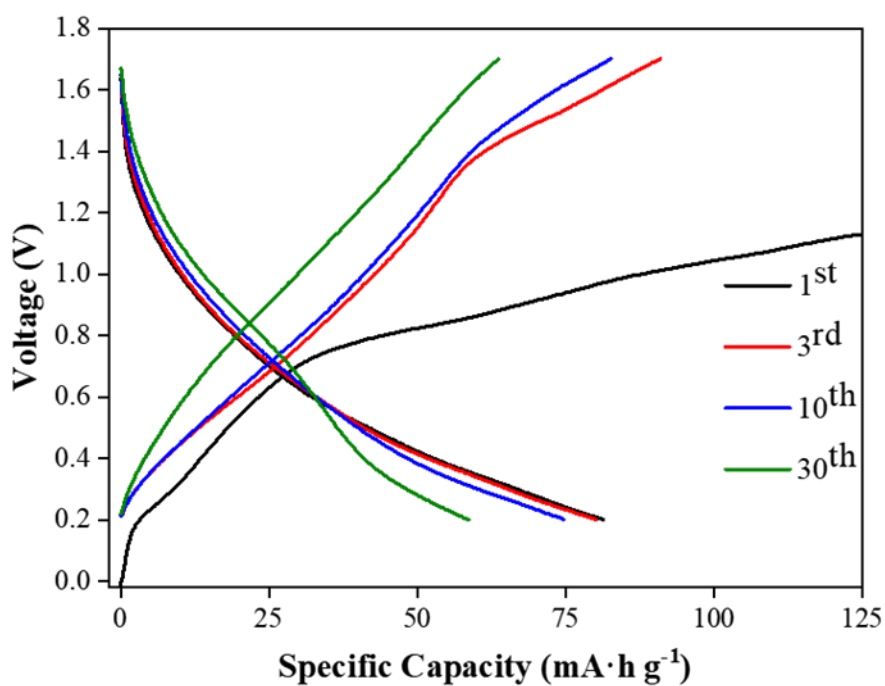

**Figure S3.** Representative galvanostatic charge-discharge curves of Zn<sub>3</sub>V<sub>2</sub>MoO<sub>8</sub>||brass battery at 100 mA g<sup>-1</sup>.

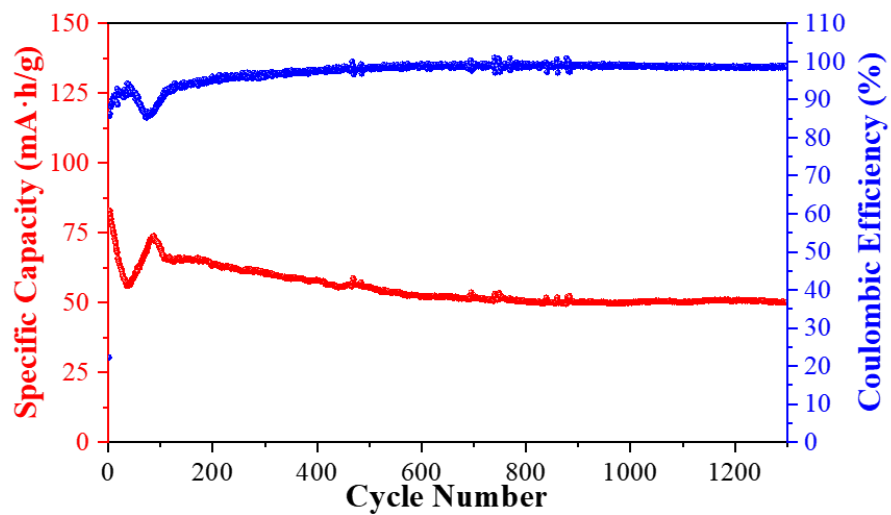

**Figure S4.** Cyclic performance of  $\text{Zn}_3\text{V}_2\text{MoO}_8||\text{brass}$  battery for the initial 1300 cycles at  $100 \text{ mA g}^{-1}$ .
